# Supplementary material for: An Experimental Method for Evaluating Ammonia Emission Rates of Bio-Curtain
Source: MDPI journal article supplement (doi:10.3390/atmos14010127), 2023-01-06
Supplement: s1 [file s1]

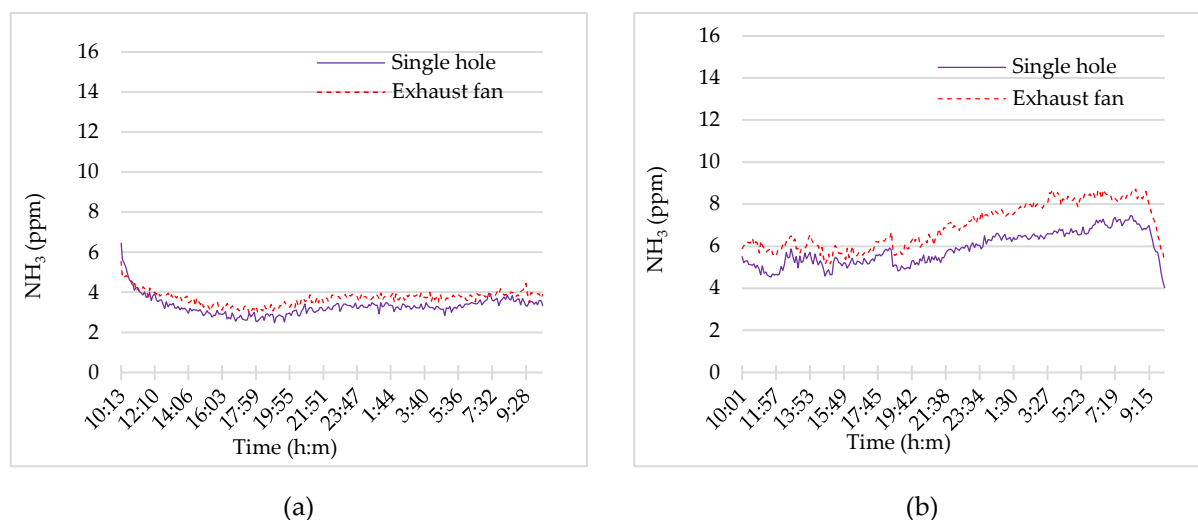

**Figure S1.** The changes of  $\text{NH}_3$  concentration for (a) 100% and (b) 30% ventilation in non-sprayed treatments.

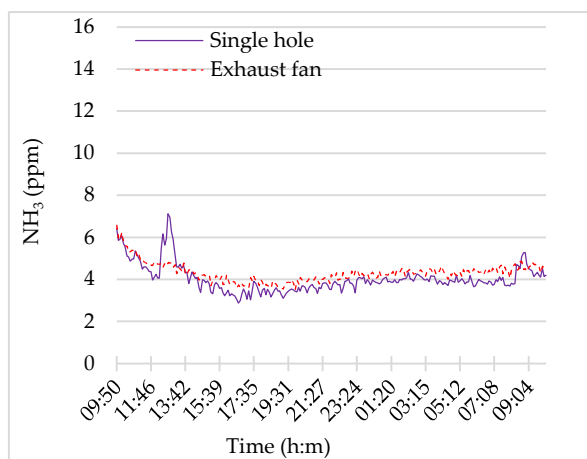

(a)

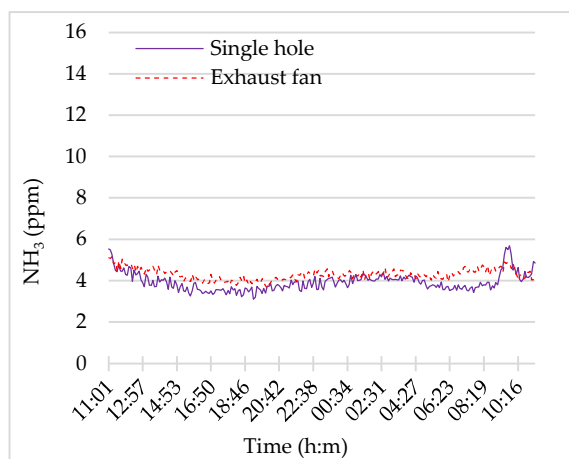

(b)

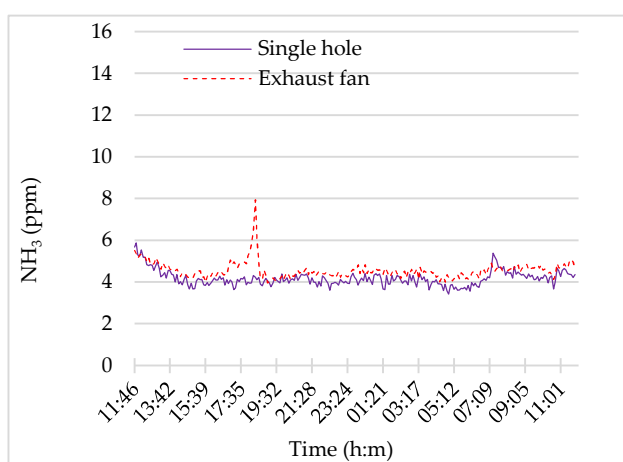

(c)

**Figure S2.** The changes of  $\text{NH}_3$  concentration by spraying water inside of the curtain at the maximum operating rate of the barn exhaust fan (100%), (a) S/P (spray time, min./pause time, min.) 10/30, (b) 10/10, (c) 10/5.

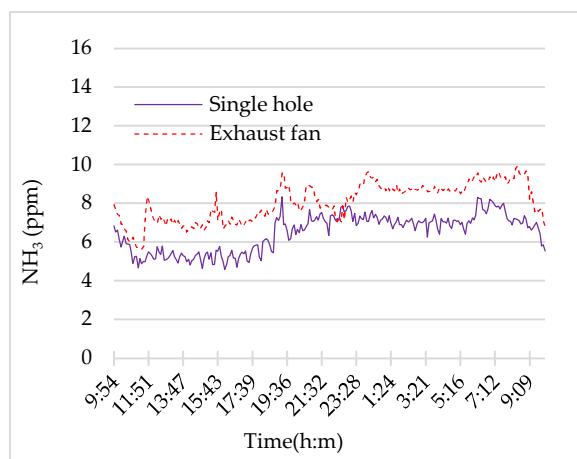

(a)

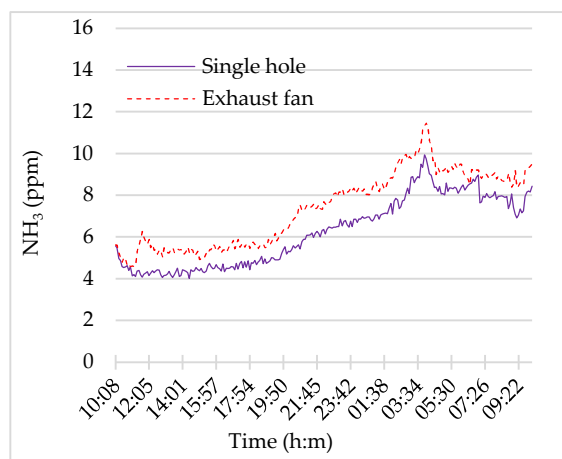

(b)

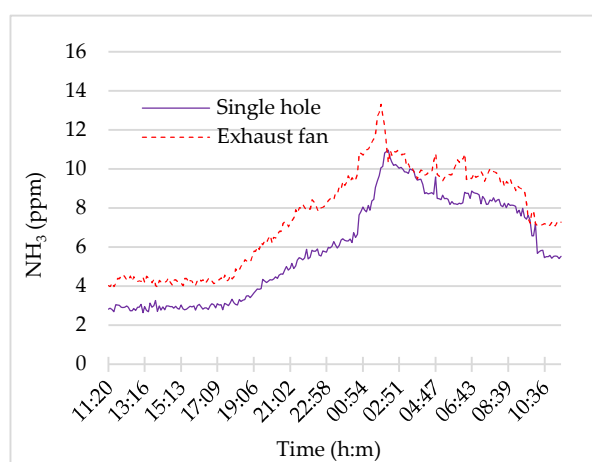

(c)

**Figure S3.** The changes of NH<sub>3</sub> concentration by spraying water inside of the curtain at the minimum operating rate of the barn exhaust fan (30%), (a) S/P (spray time, min./pause time, min.) 10/30, (b) 10/10, (c) 10/5.
